# Supplementary material for: A State-of-the-Art Review of Intra-Operative Imaging Modalities Used to Quality Assure Endovascular Aneurysm Repair
Source: MDPI journal article supplement (doi:10.3390/jcm12093167), 2023-04-28
Supplement: s1 [file s1]

| Author            | Selection | Comparability | Exposure/Outcome | Total |
|-------------------|-----------|---------------|------------------|-------|
| Biasi et al       | *** **    | ** *          | *** **           | 8     |
| Breining et al    | ***       | **            | ***              | 8     |
| Bush et al        | ***       | *             | **               | 6     |
| Chao et al        | ***       | **            | ***              | 8     |
| De Ruiter et al   | ***       | **            | ***              | 8     |
| Dijkstra et al    | ***       | **            | ***              | 8     |
| Faries et al      | **        | *             | **               | 5     |
| Gallitto et al    | ***       | **            | ***              | 8     |
| Garrett et al     | ***       | *             | **               | 6     |
| Gennai et al      | ***       | *             | **               | 6     |
| Hertault et al    | ***       | *             | **               | 6     |
| Jansen et al      | ***       | **            | ***              | 8     |
| Kaladji et al     | ***       | *             | **               | 6     |
| Keschenau et al   | ***       | **            | ***              | 8     |
| Kobeiter et al    | ***       | **            | ***              | 8     |
| Kopp et al        | ***       | **            | ***              | 8     |
| Koutouzi et al    | ***       | **            | ***              | 8     |
| Lalys et al       | ***       | **            | ***              | 8     |
| Massoni et al     | ***       | *             | **               | 6     |
| Massoni et al     | ***       | **            | ***              | 8     |
| Maurel et al      | **        | *             | **               | 5     |
| McNally et al     | ***       | **            | ***              | 8     |
| Panuccio et al    | ***       | **            | ***              | 8     |
| Rolls et al       | ***       | *             | **               | 6     |
| Schulz et al      | ***       | **            | ***              | 8     |
| Schulz et al      | ***       | **            | ***              | 8     |
| Schwein et al     | ***       | **            | ***              | 8     |
| Stangenberg et al | ***       | **            | ***              | 8     |
| Steuwe et al      | **        | *             | **               | 5     |
| Tenorio et al     | ***       | **            | ***              | 8     |
| Timaran et al     | ***       | **            | ***              | 8     |
| Tornqvist et al   | ***       | *             | **               | 6     |
